# Supplementary material for: The Arf-GAP Proteins AoGcs1 and AoGts1 Regulate Mycelial Development, Endocytosis, and Pathogenicity in Arthrobotrys oligospora
Source: MDPI journal article supplement (doi:10.3390/jof8050463), 2022-04-29
Supplement: s1 [file s1]

# Supporting Information

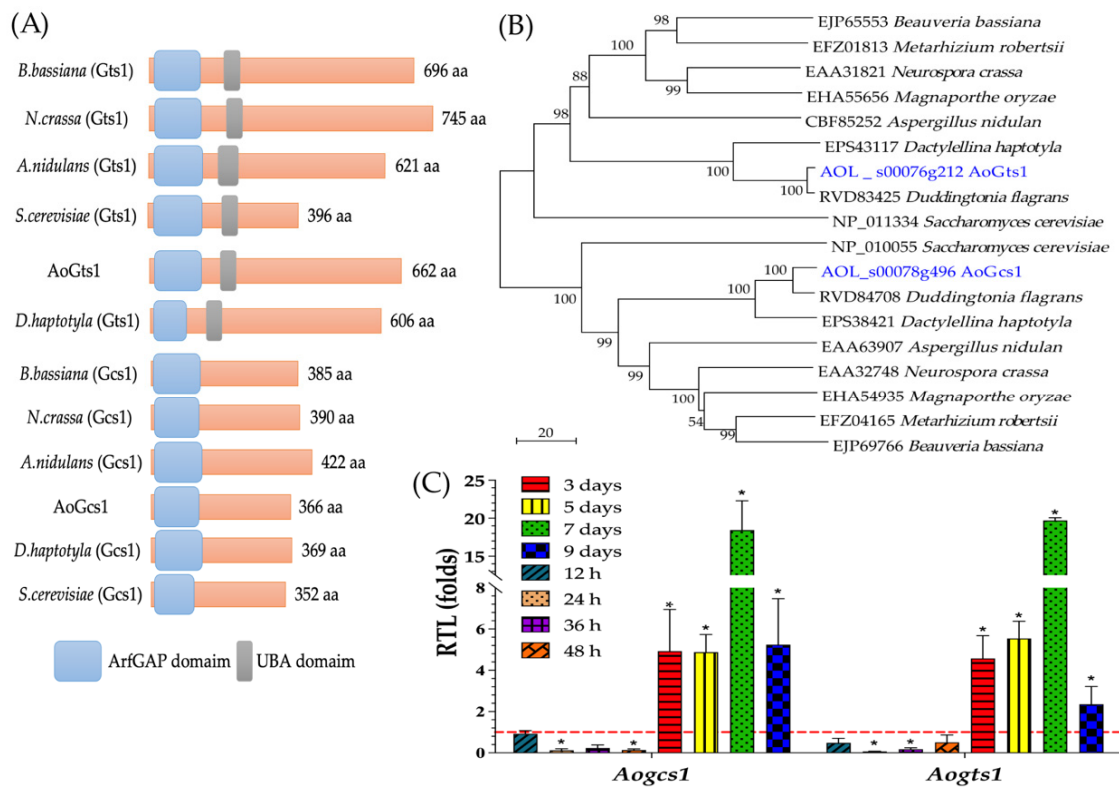

**Figure S1.** Multiple sequence alignment, phylogenetic analysis, and transcript-level analysis of Gcs1 and Gts1. (A) Analysis of the functional domains of Gcs1 and Gts1 proteins. (B) The phylogenetic tree of homologous Gcs1 and Gts1 from different fungi. Those orthologs of Gcs1 and Gts1 were separated into two clades. (C) Relative transcription level (RTL) of *Aogcs1* and *Aogts1* genes in the *A. oligospora* during the trap formation and conidiation stages. The red line indicates the standard (which has an RTL of 1) for the statistical analysis of the RTL of each gene in a deletion mutant compared to that in the WT strain under a given condition.

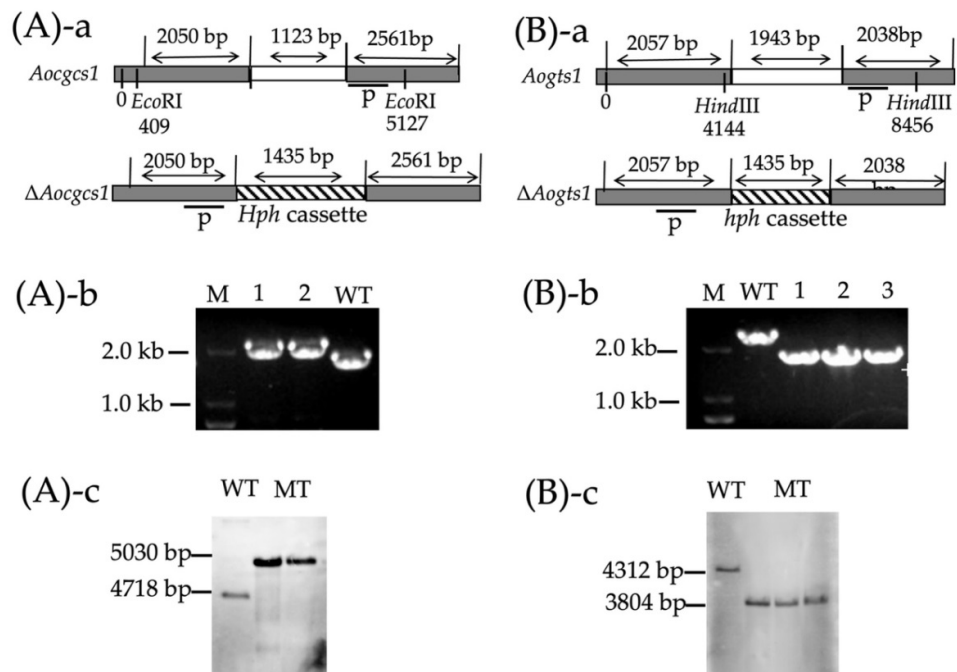

**Figure S2.** Knockout and verification of the genes *Aogcs1* and *Aogts1* in *A. oligospora*. (A-a and B-a) Diagrammatic sketch of homologous recombination of *AoGcs1* (A-a) and *AoGts1* (A-b). The homologous flanking sequences of the target gene, Southern blot probe, and the restriction enzyme sites are marked. (A-b and B-b) Positive transformants verified by PCR amplification. M denotes the DNA marker, and the numbers denote the positive transformants. (A-c and B-c) The  $\Delta Aogcs1$  (A-c) and  $\Delta Aogts1$  (B-c) mutants confirmed by Southern blots.

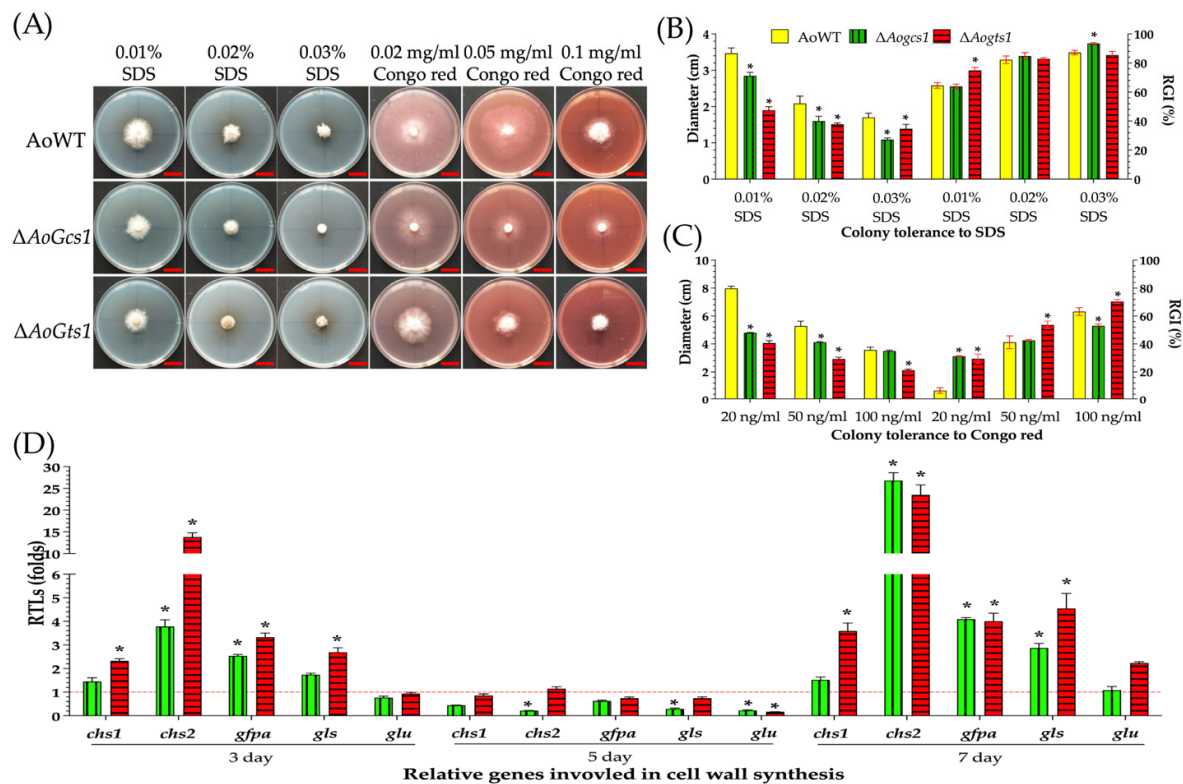

**Figure S3.** Comparison of stress tolerance to cell wall stress agents. (A) Colonial morphology of fungal strains under cell wall-interfering stress. Bar = 2 cm. (B-C) Colonial diameter and relative growth inhibition (RGI) of fungal colonies after being grown for 5 days on TG medium supplemented with different concentration of SDS and Congo red. (D) Transcriptional levels (RTLs) of cell wall synthesis-related genes in the mutants when compared with the WT strain at different time points. The asterisk indicates a significant difference between mutants and the WT strain ( $p < 0.05$ ).

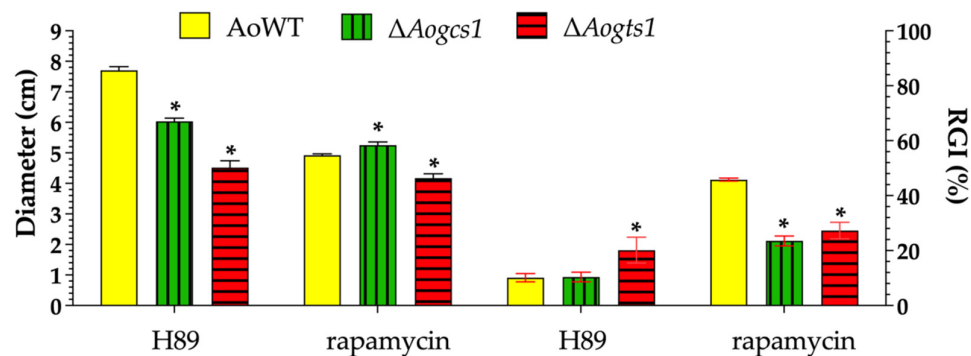

**Figure S4.** Colony diameters and RGI values of the WT and mutants cultured in the presence of 10  $\mu$ M H-89 and 10  $\mu$ M rapamycin.

**Table S1.** List of primers for gene disruption used in this study.

| Primers    | Paired sequences                                                 | Purpose                         |
|------------|------------------------------------------------------------------|---------------------------------|
| Gcs1-5F/5R | ACTGACAGCTCCAATCTCCAC/GGGGTGGT<br>GGTAGAGCATAT                   | Amplify the 5' fragment         |
| Gcs1-3F/3R | GCTGGTGGAAAGAAGAATGA/GTGGGACTT<br>ATGGTAATGATGC                  | Amplify the 3' fragment         |
| Gcs1YZ-F/R | ACTTGAGTGCGGAGACTGTTC/CCCAGTCAT<br>CATTCTTCTTTCC                 | Verify the transformants        |
| Gcs1P-F/R  | TGATGATTGGTGATGTAGA/GAGTGGATGT<br>AGTGAGATT                      | Make Southern blotting probe    |
| Gts1-5F/5R | CCCGCCTTCTTTCTACCTCT/GACCGTTGAA<br>TCTTGAACGCT                   | Amplify the 5' fragment         |
| Gts1-3F/3R | AGTGGGAAGTCAGGATCGGG/CAGAACGG<br>CACATACAATCCT                   | Amplify the 3' fragment         |
| Gts1YZ-F/R | CCTCCTTCTAAATGCCTACCT/CAAAATCCA<br>GACTCCACCAA                   | Verify the transformants        |
| Gts1P -F/R | TCGCAAAGTGGTGATGAG/ATTACCCAGTC<br>CCAAACA                        | Make Southern blotting probe    |
| Hph-F/R    | GTCGGAGACAGAAGATGATATTGAAGGAG<br>C/GTTGGAGATTTCAGTAACGTTAAGTGGAT | Amplify the <i>hph</i> cassette |

**Table S2.** Paired primers for RT-PCR analysis of genes associated with phenotypes such as conidiation, stress resistance, serine proteases, and autophagy in *A. oligospora*.

| Sporulation genes               | Paired sequences (5'-3')                     |
|---------------------------------|----------------------------------------------|
| AOL_s00169g18 ( <i>veA</i> )    | AAGCTACACCCAATCAACGC/TGCGATGCTGACGATCTTG     |
| AOL_s00054g700 ( <i>vosA</i> )  | CAAACCACCCACCACCAAAT/GGATGGACAGGAGAAGGACC    |
| AOL_s00054g811 ( <i>velB</i> )  | ATTCCGCAACTTCTCCCTCA/GGCATGTTTGGATTCTGGGG    |
| AOL_s00080g63 ( <i>abaA</i> )   | AAC TTATGCGCCTTGTCGT/TTGGCTAGGTGGTCTGTACG    |
| AOL_s00043g361 ( <i>fluG</i> )  | GATTCCAGTCCCGTGAATTC/GCTAAGGAGAGGATGGGCAT    |
| Cell wall biosynthesis          | Paired sequences                             |
| AOL_s00078g76 ( <i>chs-1</i> )  | GCCACTCTGCCATCTTTAGC/GCATCTTCACCCGCACCAGT    |
| AOL_s00075g119 ( <i>chs-2</i> ) | TCCCTCCAGTCCAGATGATG/TCTTGAGACCTCGACCCAAC    |
| AOL_s00076g99 ( <i>gfpa</i> )   | CCATCATCGAGCACACCAAG/CCACCGAGAGTCACTGTCTT    |
| AOL_s00083g375 ( <i>glu</i> )   | GTCATCCTCAAGAACGTCGC/ATATGGAAAGTTGGCCGTGC    |
| AOL_s00054g491 ( <i>gls</i> )   | AGCTCTGTTCTGGTGATGCT/GATGTTTCGCCAAGGACTCC    |
| Antioxidant-related genes       | Sequence (5'-3')                             |
| AOL_s00215g326 ( <i>per</i> )   | CACCATCCGCTCTGTCTTCA/GACGGCATCCTCGGTCTTGA    |
| AOL_s00054g257 ( <i>thr</i> )   | TTTCGGTCAAGAGCAAAAGTG/GCTATCATTCATTCCCCATT   |
| AOL_s00078g209 ( <i>trxR</i> )  | TGTCATCGGTGGTGGAGATT/ACAAGAGAGGTAGCGGGTTC    |
| AOL_s00076g213 ( <i>trx</i> )   | TTGATTTCCACGCAACCTGG/CCGAACCTGATGAAGAAGCG    |
| AOL_s00054g13( <i>glr</i> )     | CGAAAAGTCTGAATCGGGTGA/GCTCCACTTTGCCACATACATC |
| Hyperosmolarity-related         | Sequence (5'-3')                             |

| genes                           |                                             |
|---------------------------------|---------------------------------------------|
| AOL_s00109g23 ( <i>hog1</i> )   | GATGTTGGAGGGAAAGCCAC/TGGGTAACGACTGGACGAATC  |
| AOL_s00078g396 ( <i>sho1</i> )  | TATCAGATGCAAACGGCAGC/CTTGTAAGCACCAAACCGCT   |
| AOL_s00081g16 ( <i>sln1</i> )   | TCCTACCGCCTCGAAAAGTT/CTTTCTGATGCGACACTCGG   |
| AOL_s00112g14 ( <i>ssk1</i> )   | CTGATTCTAGAGCGGGAGG/AGCAGGTAACACTCCAGGAC    |
| AOL_s00076g216 ( <i>msn2</i> )  | GCGGTGATGATGACCAGTTC/TCGTCTTCGGAATCACCCAA   |
| Autophagy related genes         |                                             |
| Sequence (5'-3')                |                                             |
| AOL_s00076g234 ( <i>atg1</i> )  | GCCATTAGATTGCCACCAG/CAGTTCGGTTCGTCACTCCC    |
| AOL_s00007g534 ( <i>atg8</i> )  | AGCGTATCAAGCTGTCTCCC/CTCGTAGCCGAAGGTGTTTT   |
| AOL_s00054g371 ( <i>atg9</i> )  | TTCTTCGGAGGACAGAGCAT/CTAGGTTTGCGTGAAAAGTCG  |
| AOL_s00215g74 ( <i>atg13</i> )  | AGAGGTGGAGGGTTGATTGA/GGAGTTTCCATGATGGCAGT   |
| AOL_s00043g575 ( <i>atg17</i> ) | GAGATTCAGAACTCGTGGTT/AAGAAGTGAGGGTGTATTGC   |
| cAMP/PKA related gene           |                                             |
| Sequence (5'-3')                |                                             |
| AOL_s00043g480 ( <i>pka</i> )   | CAGGTAGTTTCGGTCGTGTG/CGTTCGTGCTTTGTGTGCT    |
| AOL_s00078g405 ( <i>crp</i> )   | TTGTTGGATGCAAGAGGCC/GGGAACCGCAAAGGAAT       |
| AOL_s00075g84 ( <i>cap</i> )    | ACGAAGTCGGCCCTAATGA/GGCGGGGAAGCAGAAATAC     |
| AOL_s00193g34 ( <i>som1</i> )   | CGCAGATTGCCCCTTACC/GATTCGCCTGGACTTGGA       |
| AOL_s00080g284 ( <i>acy</i> )   | GGTGAATCGTGCCGCTCGTA/TCATIGGGCTTGCTCGCTGT   |
| AOL_s00043g12 ( <i>fkbp12</i> ) | GACGGCTAACGGCTCATAA/GCTTTGGGGAGAAGGACAG     |
| AOL_s00079g187 ( <i>rtor</i> )  | TGCTGCTTACGAGGCTGAG/TCCCGAAGGCTGGTATGAC     |
| AOL_s00097g622 ( <i>mtor</i> )  | CCGCCAGATCGCAGAATG/GTGCTAAGAACGCCAAGGAA     |
| Serine protease genes           |                                             |
| Sequence (5'-3')                |                                             |
| AOL_s00112g42                   | CTGGCTCTTGGCCTACTTTG/AGGAGGTTGACGGTCTCCTT   |
| AOL_s00075g8                    | TTGCTACTTTACTGCCCCCTTG/TCITCAGCTTGAGTCCGGTT |
| AOL_s00215g702                  | GTCGCCGCTGACTTAACTGT/ATAATTGCTGATTTCGCTGGG  |
| AOL_s00078g136                  | ACACTTGCCCATTTCACTCC/GCTGGGTTTCACAACATCCT   |
| AOL_s00054g992                  | TCCGCAACTTCAAGAGTGTG/CGTTGGCTTCCTCGTTAGAG   |
| AOL_s00076g4                    | CCATGGTGTGGAAGGAAAT/GTCTGTTACGCGTACGTAGT    |

**Table S3.** The sequence similarity between AoGsc1/AoGts1 and orthologs from different fungi. The sequence similarity of orthologous AoGsc1/AoGts1 was analyzed using DNAMAN software.

| Species                         | Simialrity to AoGsc1<br>(%) | Simialrity to AoGts1<br>(%) | Group                   |
|---------------------------------|-----------------------------|-----------------------------|-------------------------|
| <i>Arthrotrichia oligospora</i> | 100                         | 100                         | NT fungi                |
| <i>Duddingtonia flagrans</i>    | 93.7                        | 95.5                        |                         |
| <i>Dactylellina haptotyla</i>   | 83.7                        | 75.5                        |                         |
| <i>Neurospora crassa</i>        | 44.8                        | 31.6                        | Other filamentous fungi |
| <i>Aspergillus nidulans</i>     | 46.5                        | 28.3                        |                         |
| <i>Metarhizium robertsii</i>    | 47.9                        | 30.2                        |                         |
| <i>Beauveria bassiana</i>       | 46.8                        | 31.7                        |                         |
| <i>Magnaporthe oryzae</i>       | 46.3                        | 29.8                        | Yeast                   |
| <i>Saccharomyces cerevisiae</i> | 38.1                        | 27.8                        |                         |
